# Supplementary material
Source: ML conference proceedings conference paper supplement (https://openreview.net/forum?id=PXGY9Fz8vC)
Supplement: supplementary_material [file attachment]

# Ranking performance across auditing thresholds

Top-5 sensitivity (  $\uparrow$  )

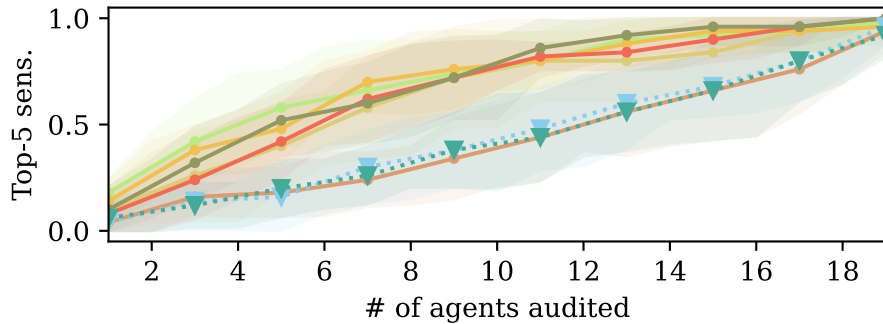

Discounted cumulative gain (DCG,  $\uparrow$  )

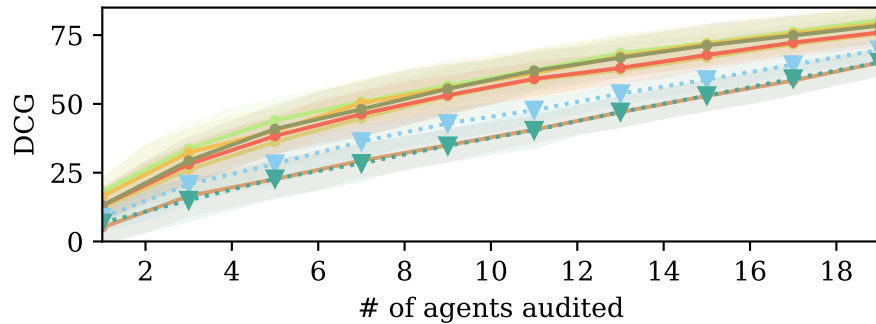

Causal effect estimator

S-learner   DragonNet   T-learner   R-learner   S+IPW   PSM   Random   Payout-only
