# Supplementary material
Source: ML conference proceedings conference paper supplement (https://openreview.net/forum?id=PXGY9Fz8vC)

# Ranking performance, causal vs. non-causal approaches

## Top-5 sensitivity ( $\uparrow$ )

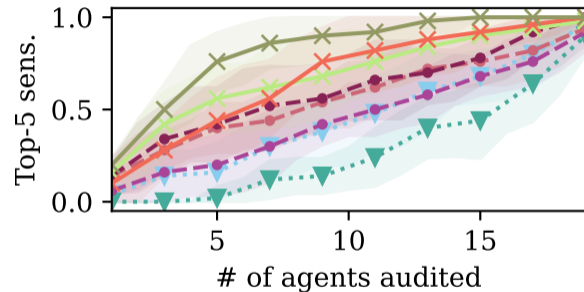

## Disc. cumulative gain (DCG, $\uparrow$ )

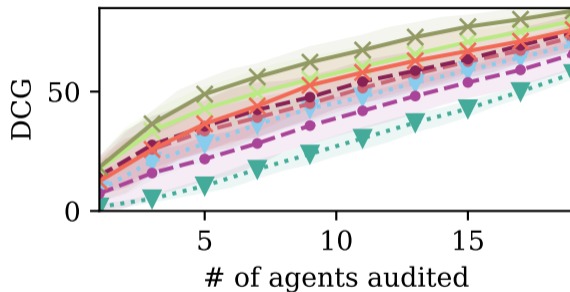

## Top-5 sens. ( $\uparrow$ ), 7 audits

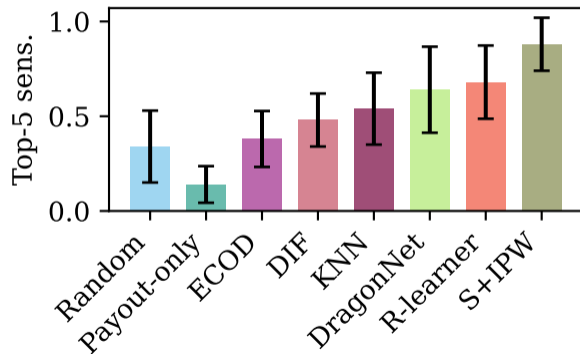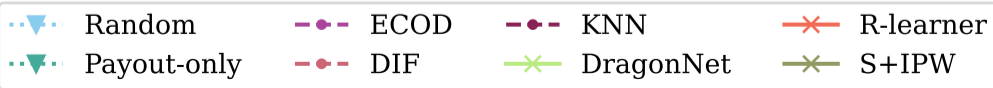

Supplement: supplementary_material [file attachment]
