# Supplementary material
Source: ML conference proceedings conference paper supplement (https://openreview.net/forum?id=PXGY9Fz8vC)
Supplement: supplementary_material [file attachment]

# Ranking performance across auditing thresholds

## Top-5 sensitivity ( $\uparrow$ )

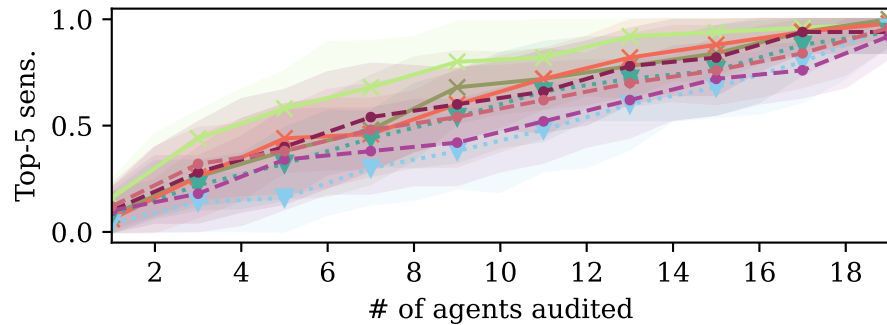

## Discounted cumulative gain (DCG, $\uparrow$ )

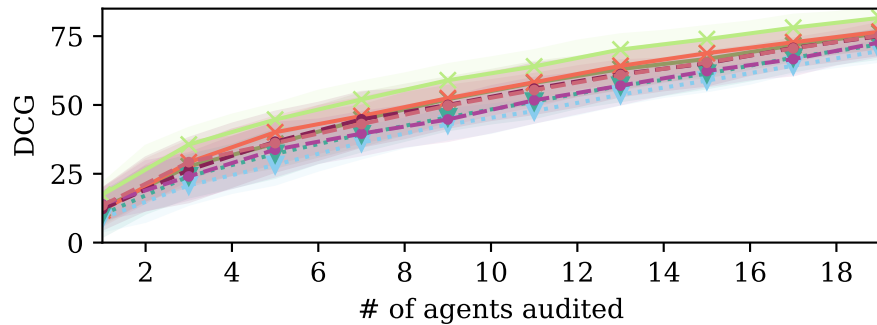

Legend: DragonNet (green line with 'x' markers), S+IPW (olive line with 'x' markers), R-learner (red line with 'x' markers), Random (blue dotted line with downward triangle markers), Payout-only (teal dotted line with downward triangle markers), KNN (dark red dashed line with circle markers), ECOD (purple dashed line with circle markers), DIF (brown dashed line with circle markers).
