# Supplementary material
Source: ML conference proceedings conference paper supplement (https://openreview.net/forum?id=PXGY9Fz8vC)
Supplement: supplementary_material [file attachment]

# Ranking performance, causal vs. non-causal approaches

## Top-5 sensitivity ( $\uparrow$ )

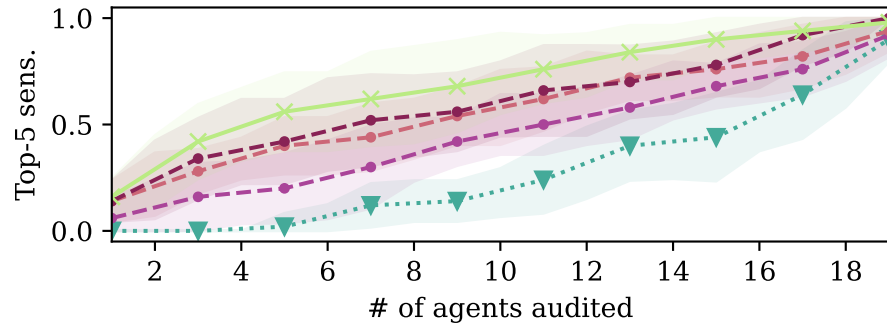

## Disc. cumulative gain (DCG, $\uparrow$ )

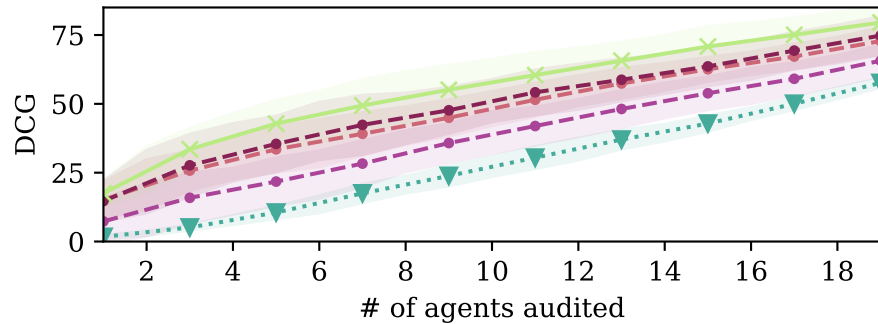

Legend: Payout-only (teal dotted line with downward triangles), ECOD (purple dashed line with circles), DIF (red dashed line with circles), KNN (dark red dashed line with circles), DragonNet (light green solid line with 'x' markers).
