# Supplementary material
Source: ML conference proceedings conference paper supplement (https://openreview.net/forum?id=PXGY9Fz8vC)
Supplement: supplementary_material [file attachment]

# Ranking performance across auditing thresholds

## Top-5 sensitivity ( $\uparrow$ )

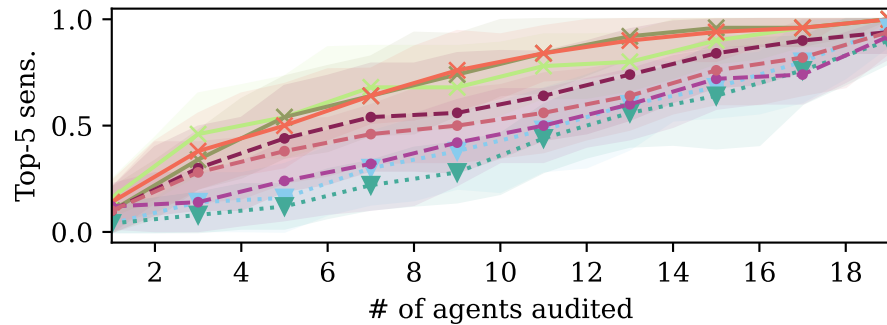

## Discounted cumulative gain (DCG, $\uparrow$ )

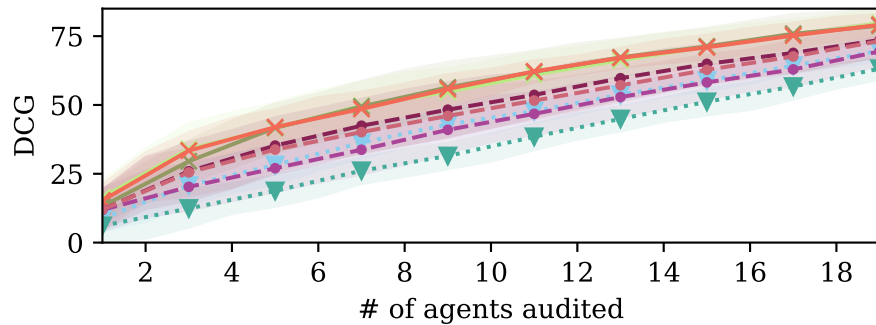

—x— DragonNet    —x— S+IPW    —x— R-learner    ···▼··· Random    ···▼··· Payout-only    -●- KNN    -●- ECOD    -●- DIF
