# Supplementary material
Source: ML conference proceedings conference paper supplement (https://openreview.net/forum?id=PXGY9Fz8vC)

# S+IPW vs. KNN, AUSC ( $\uparrow$ )

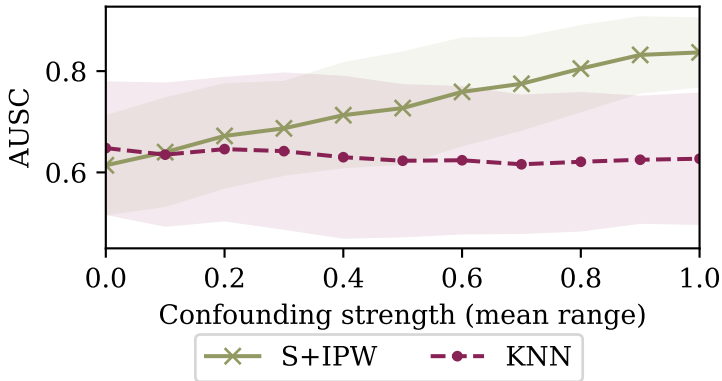

Supplement: supplementary_material [file attachment]

Area under the sensitivity curve (AUSC,  $\uparrow$ ) vs. confounding strength

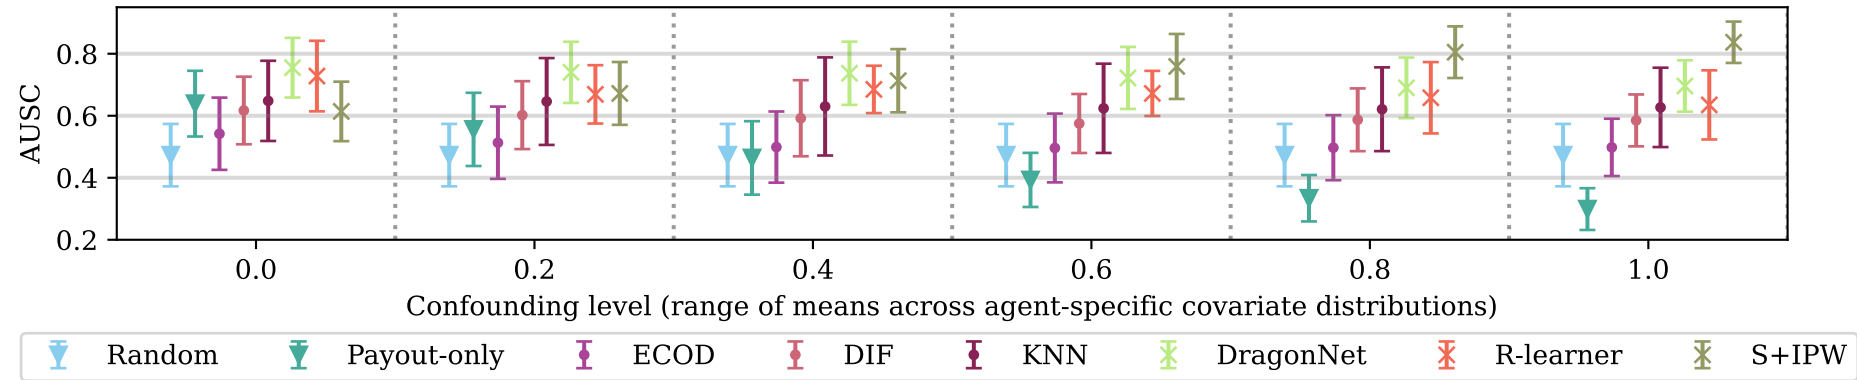

Supplement: supplementary_material [file attachment]
